# Supplementary material for: Low-temperature processed high-performance flexible perovskite solar cells via rationally optimized solvent washing treatments
Source: Royal Society of Chemistry journal article supplement (doi:10.1039/c4ra13212b), 2014-11-14
Supplement: c4ra13212b1.pdf [file c4ra13212b1.pdf]

Supporting Information

**Low-Temperature Processed High-Performance Flexible Perovskite Solar Cells via Optimized Solvent Washing Treatment**

**Jae Woong Jung<sup>a</sup>, Spencer T. Williams<sup>a</sup> and Alex K.-Y. Jen<sup>\*ab</sup>**

<sup>a</sup>Department of Materials Science and Engineering, University of Washington, Seattle, WA 98195, USA,

E-mail: [ajen@u.washington.edu](mailto:ajen@u.washington.edu)

**Experimental**

*Materials and Sample Preparation.* Methylammonium iodide was synthesized by reacting 24 mL of 0.20 mole methylamine (33 wt% in absolute ethanol, Aldrich), 10 mL of 0.04 mole hydroiodic acid (57 wt% in water with 1.5% hypophosphorous acid, Alfa Aesar), and 100 mL ethanol in a 250 mL round bottom flask under nitrogen at 0 °C for 1 h with stirring. After reaction, the white solid of MAI was recovered by rotary evaporation and then recrystallized in mixture of ethanol and diethyl ether. The CH<sub>3</sub>NH<sub>3</sub>I powder was collected and dried at 50 °C in a vacuum oven for 24 h. To prepare the perovskite precursor solution, CH<sub>3</sub>NH<sub>3</sub>I and PbI<sub>2</sub> (Aldrich) were dissolved in mixed solvent of dimethylsulfoxide and  $\gamma$ -butyrolactone (3:7 in volume) in 1 M concentration. The solution was stirred overnight at room temperature and filtered with 0.45  $\mu$ m PVDF filters before spin-coating.

*Fabrication of thin-film perovskite solar cells.* The devices were fabricated as reported elsewhere.<sup>S1</sup> Briefly, ITO on glass (15  $\Omega$ /sq) or PET (50  $\Omega$ /sq) substrates were cleaned sequentially with detergent and deionized water, acetone, and isopropanol under sonication for 10 min. After drying under a N<sub>2</sub> stream, substrates were further cleaned by a plasma treatment for 30 s. PEDOT:PSS (Baytron P VP Al 4083, filtered through a 0.45  $\mu$ m nylon filter) was first spin-coated onto the substrates at 5k rpm for 30 s and annealed at 95 °C for 10 min in ambient atmosphere. After the substrates were into N<sub>2</sub>-filled glovebox, the precursor solution was spin-coated at 5k rpm for 45 s. After 25 s, 80  $\mu$ l of non-polar solvent (toluene,

CB or DCB) was poured on top of the substrates during spinning. After thermal annealing was finished, PCBM (15 mg/mL in chloroform) and C<sub>60</sub>-bis surfactant (2 mg/mL in isopropyl alcohol) were then sequentially deposited by spin coating at 1k rpm for 60 s and 3k rpm for 60 s, respectively. Silver electrodes with a thickness of 120 nm were finally evaporated under high vacuum ( $< 2 \times 10^{-6}$  Torr). The device area was defined by the mask area as 3.14 mm<sup>2</sup>. All the  $J$ - $V$  curves in this study were recorded using a Keithley 2400 source meter unit and the scan rate was 1 V/s. For precise measurements of the solar cell performance, both forward and backward scans were recorded for each device. No hysteresis was observed (almost the same photovoltaic parameters such as  $V_{OC}$ ,  $J_{SC}$  or FF) in our perovskite solar cell devices as shown in Fig. S4. The device photocurrent was measured under AM1.5 illumination condition at an intensity of 100 mW cm<sup>-2</sup>. The illumination intensity of the light source was accurately calibrated with a standard Si photodiode detector equipped with a KG-5 filter, which can be traced back to the standard cell of the National Renewable Energy Laboratory (NREL). The EQE spectra performed here were obtained from an IPCE setup consisting of a Xenon lamp (Oriel, 450 W) as the light source, a monochromator, a chopper with a frequency of 100Hz, a lock-in amplifier (SR830, Stanford Research Corp), and a Si-based diode (J115711-1-Si detector) for calibration.

*Characterizations.* UV-Vis spectra were measured using a Perkin-Elmer Lambda-9 spectrophotometer. Surface of the perovskite thin films were observed using FEI Sirion SEM. X-ray diffraction was investigated by using X-ray diffractometer (Bruker D8 Discover). For time-resolved photoluminescence, the precursor solution was coated on top of the neat glass substrates or PEDOT:PSS coated ITO glass in the same manner to preparation of the solar cell device. To quench the electrons, PCBM layer was also deposited by spin-coating in the same manner to the solar cell devices. PMMA was then deposited on top of the film spin-coating chloroform solutions (10 mg/ml) at 1000 rpm. The carrier life time was measured by a time-correlated single photon counting (TCSPC) system (FluoTime 100, PicoQuant GmbH).

Samples were photoexcited using a 467 nm laser beam (LDH-P-C-470, PicoQuant GmbH) pulsed at frequencies between 0.5-10MHz with a pulse duration of 60 ps and fluence of  $\sim 10$  nJ/cm<sup>2</sup> to avoid nonlinear effects such as exciton-charge annihilation, and the emission light was collected after passing a 665 nm long-pass filter to block reflected excitation laser. The lifetime was obtained by fitting the PL measured from perovskite films with a bi-exponential decay function of the form:

$$I(t) = A_1 \exp\left(-\frac{t}{\tau_1}\right) + A_2 \exp\left(-\frac{t}{\tau_2}\right)$$

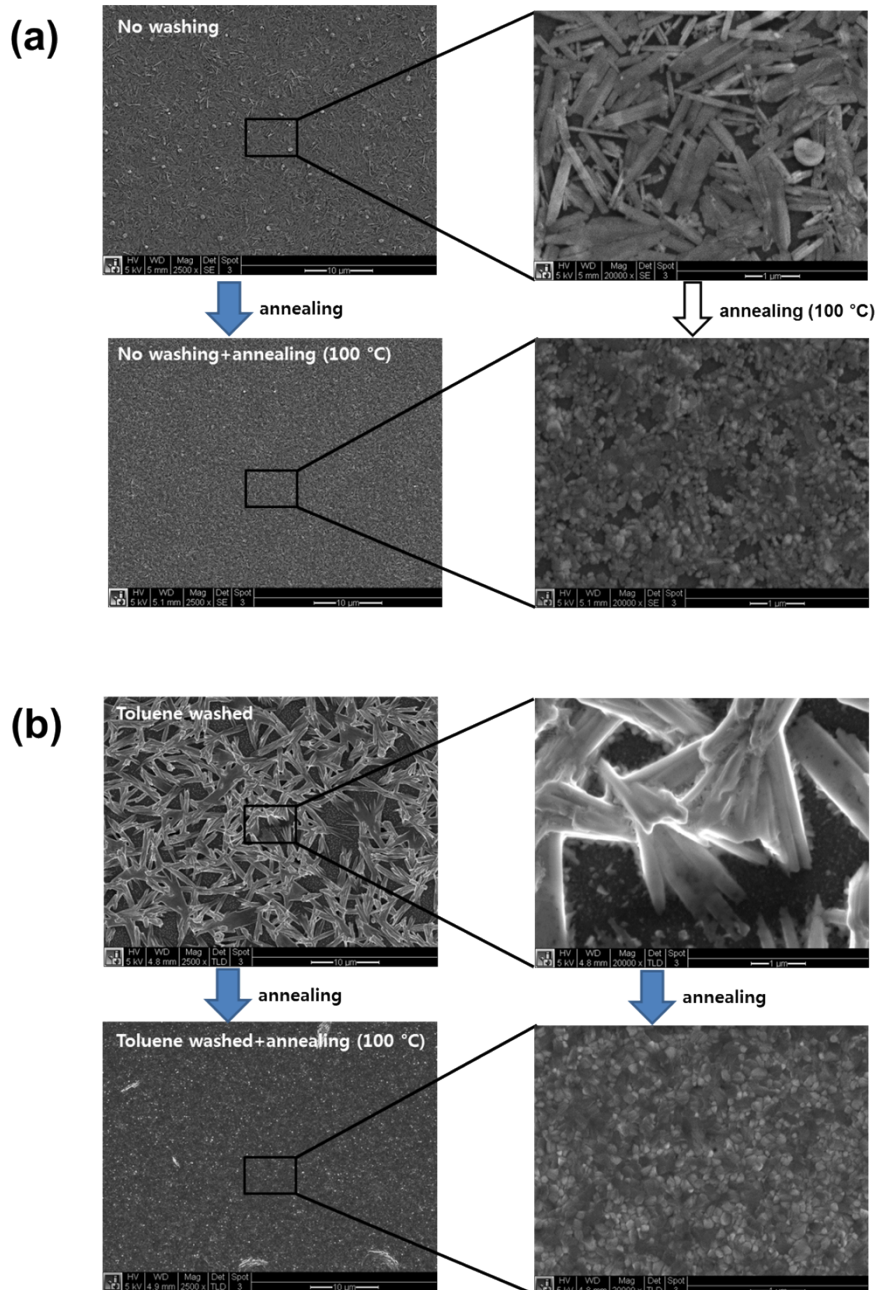

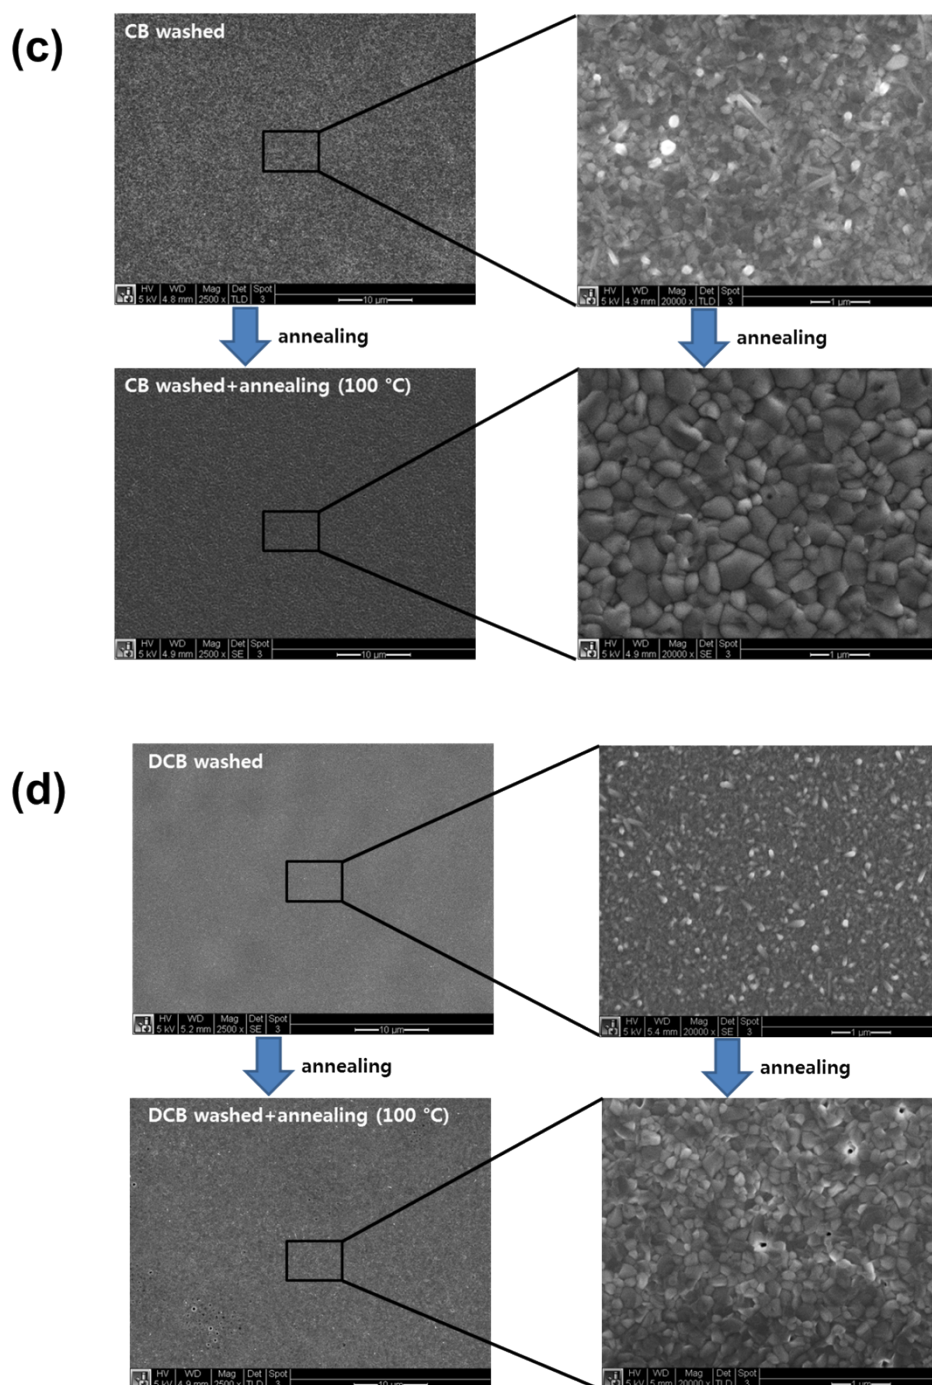

**Fig. S1** SEM images of surface morphology of  $\text{CH}_3\text{NH}_3\text{PbI}_3$  thin films fabricated through solvent washing (top) and subsequent thermal annealing at 100 °C (bottom). (a) no solvent washing, (b) toluene washing, (c) CB washing, (d) DCB washing

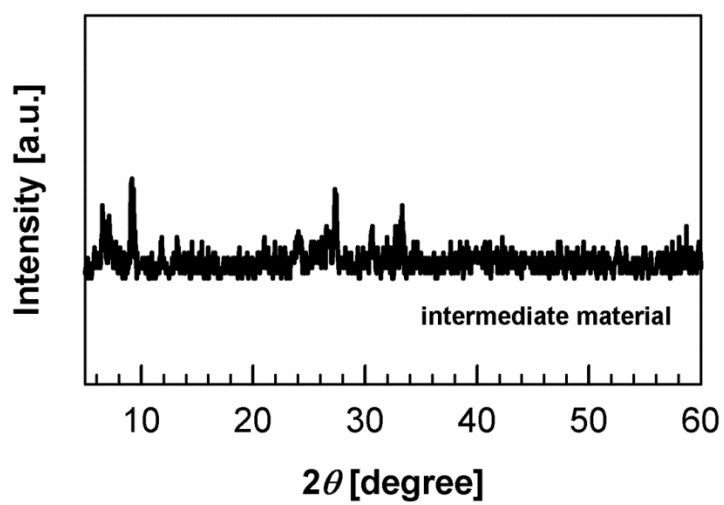

**Fig. S2** X-ray diffractogram of intermediate phase materials.

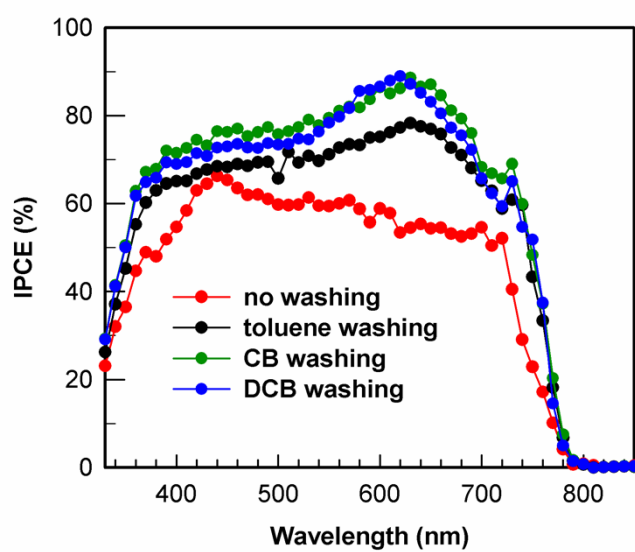

**Fig. S3** IPCE spectra of the PSCs processed by different washing solvent.

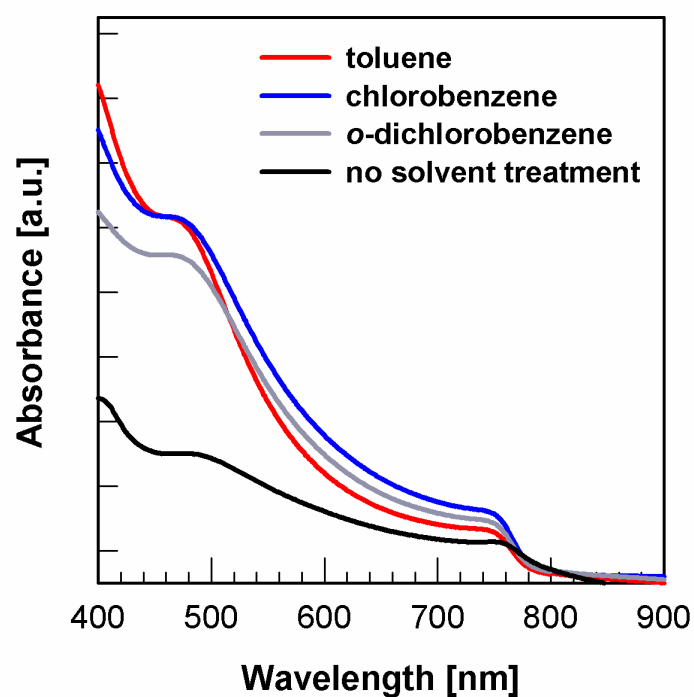

**Fig. S4** UV-Vis absorption spectra of the perovskite films fabricated through solvent-washing and thermal annealing at 100 °C for 15 min.

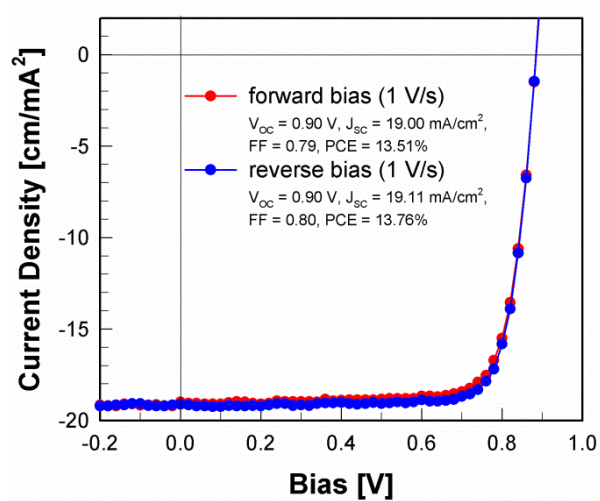

**Fig. S5** J-V curves of forward and reverse scan from CB-washed PSCs.

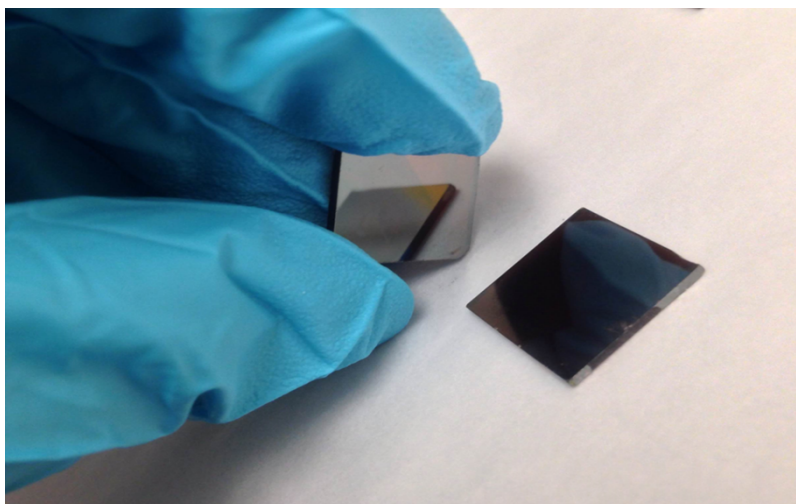

**Fig. S6** Photograph of CB-washed perovskite film. Two films are annealed at 60 °C for 10 min and showing mirror-like smooth surface with dark film color.



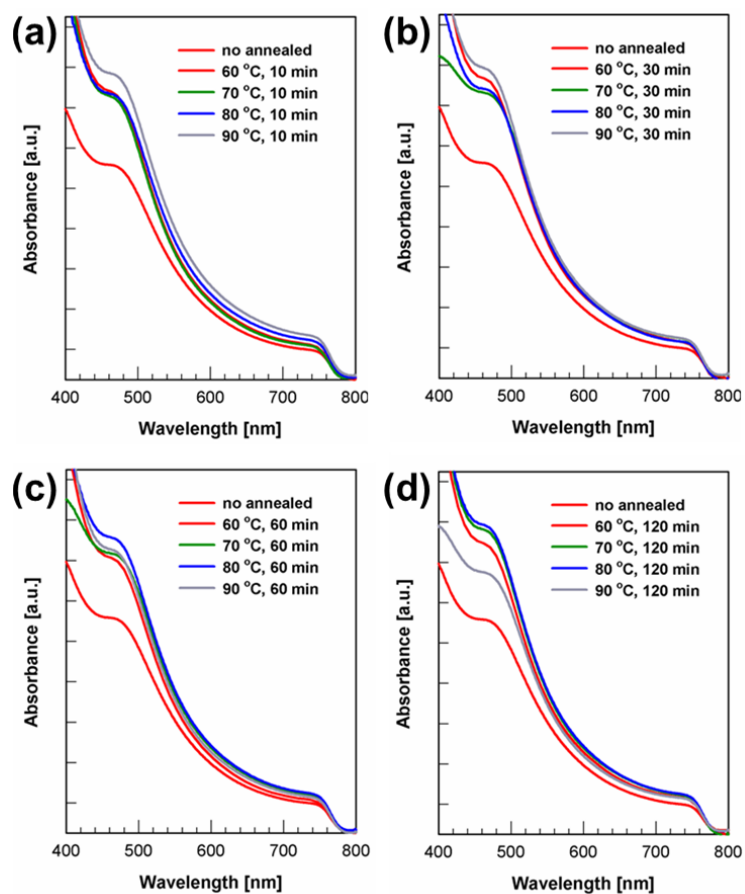

**Fig. S7** UV-Vis absorption spectra of the perovskite films fabricated through solvent-washing and low-temperature annealing for (a) 10 min, (b) 30 min, (c) 60 min, and (d) 120 min.

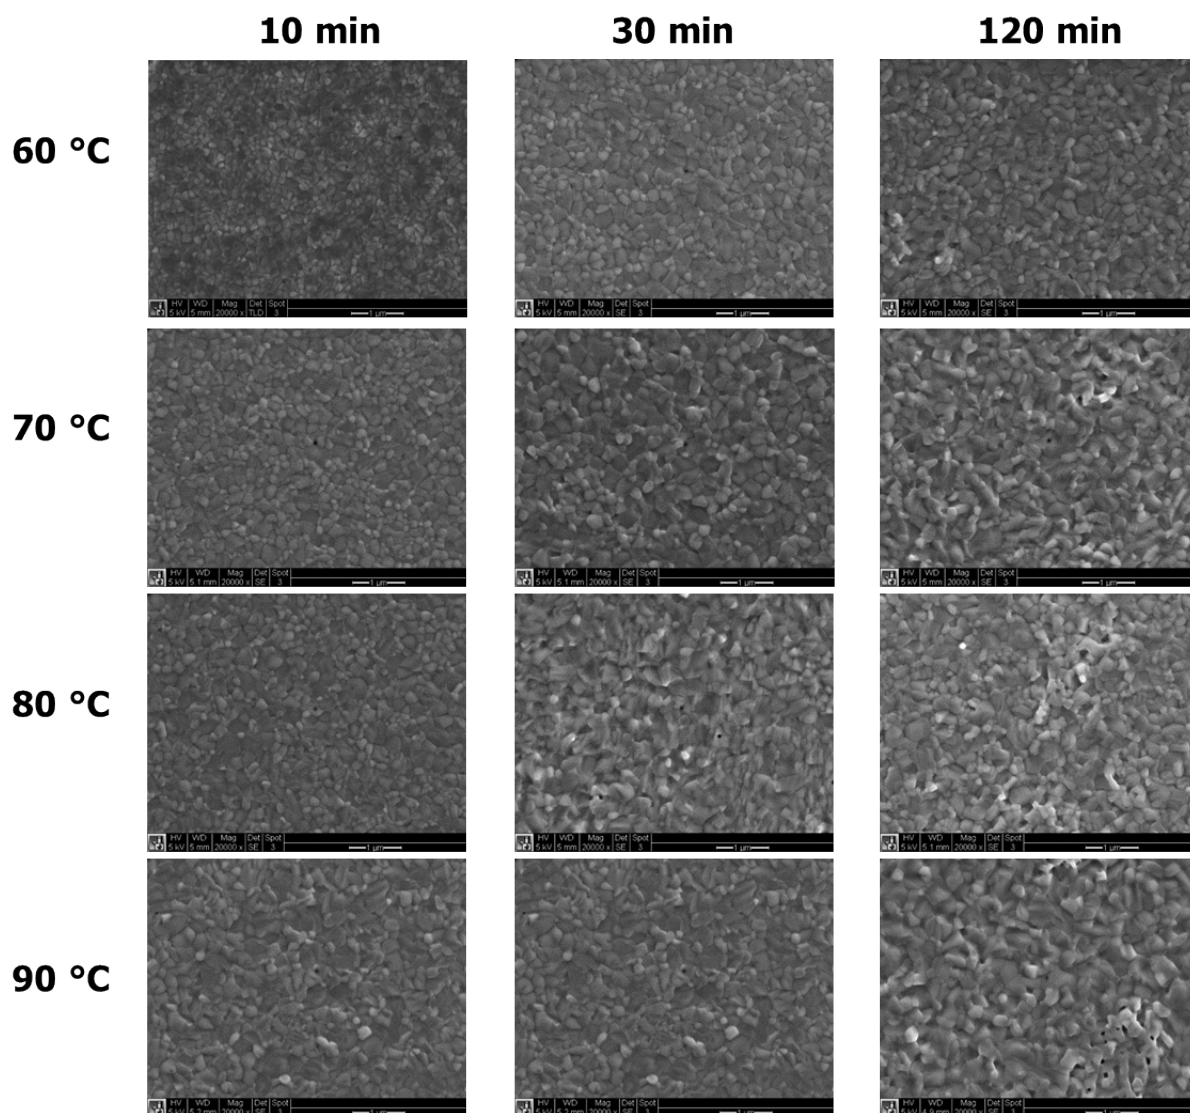

**Fig. S8** SEM images of surface morphology of perovskite thin films fabricated through CB washing and subsequent low-temperature annealing for different time.

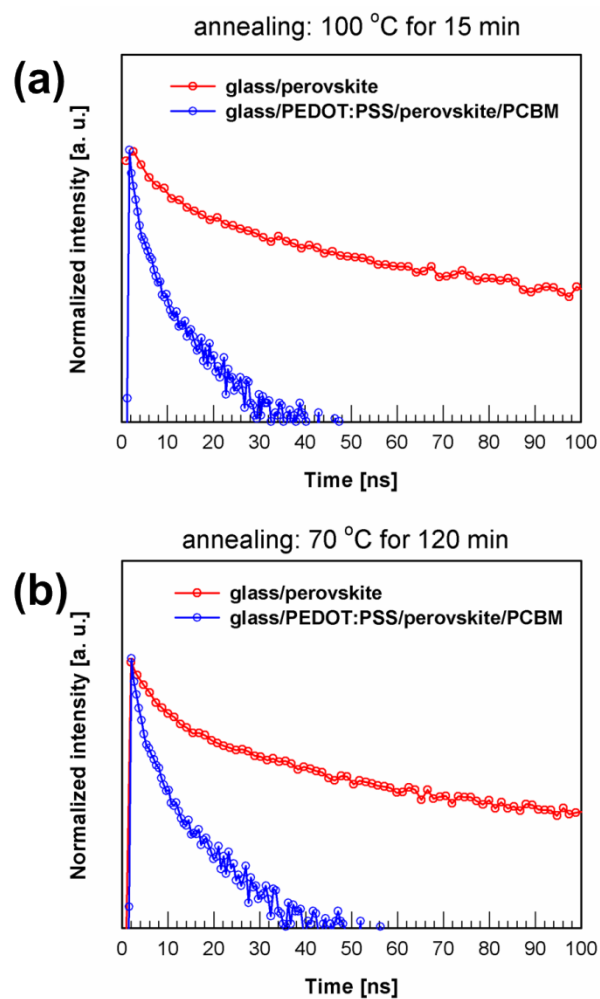

**Fig. S9** Time resolved photoluminescence characterization of the CB-washed perovskite films annealed at (a) 100 °C and (b) 70 °C.

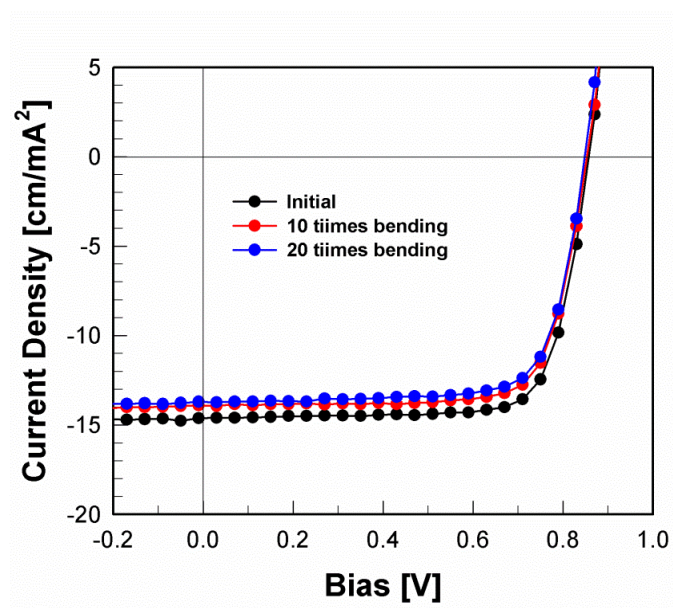

**Fig. S10**  $J$ - $V$  curve of the perovskite solar cells on flexible substrates after different bending time. (Initial:  $V_{OC} = 0.86$  V,  $J_{SC} = 14.62$  mA/cm<sup>2</sup>, FF = 0.75, PCE = 9.43%; 10 times bending:  $V_{OC} = 0.86$  V,  $J_{SC} = 13.91$  mA/cm<sup>2</sup>, FF = 0.74, PCE = 8.85%; 20 times bending:  $V_{OC} = 0.85$  V,  $J_{SC} = 13.57$  mA/cm<sup>2</sup>, FF = 0.73, PCE = 8.42%)

**Table S1.** Comparison of performance of the solution-processed flexible perovskite solar cells with other devices reported in the literature.

| Reference | annealing temperature<br>(°C) | $V_{OC}$<br>(V) | $J_{SC}$<br>(mA/cm <sup>2</sup> ) | FF   | PCE<br>(%) |
|-----------|-------------------------------|-----------------|-----------------------------------|------|------------|
| this work | 70                            | 0.86            | 14.62                             | 0.75 | 9.43       |
| S2        | 70                            | 0.80            | 7.52                              | 0.43 | 2.59       |
| S3        | 90                            | 0.86            | 16.5                              | 0.64 | 9.08       |
| S4        | 100                           | 0.88            | 14.4                              | 0.51 | 6.46       |
| S5        | - <sup>a</sup>                | 1.04            | 14.3                              | 0.47 | 6.99       |

<sup>a</sup> vacuum deposition

#### Reference

- S1. Liang *et al.*, *Advanced Materials*, **2014**, 26, 3748.  
 S2. Kumar *et al.*, *Chemical Communications*, **2013**, 49, 11089.  
 S3. You *et al.*, *ACS Nano*, **2014**, 8, 1674  
 S4. Docampo *et al.*, *Nature Communications*, **2014**, 4, 2761.  
 S5. Roldán-Carmona *et al.*, *Energy & Environmental Science*, **2014**, 7, 994.
